# Supplementary material for: Advances in the modulation engineering of ferroelectrics and multiferroics with non-chemical agents and factors: a review
Source: Royal Society of Chemistry journal article supplement (doi:10.1039/d3ta04405j), 2023-11-23
Supplement: d3ta04405j1.pdf [file d3ta04405j1.pdf]

## **Advance in modulation engineering of ferroelectrics and multiferroics with non-chemical agents and factors: a review**

Xinqiu Deng<sup>†ab</sup>, Yuying Wu<sup>†ab\*</sup>, Zhangran Gao<sup>†c</sup>, Gang Zhou<sup>d\*</sup>

*<sup>a</sup>School of Electrical Engineering, Shanghai DianJi University, Shanghai, 201306, People's Republic of China*

*<sup>b</sup>College of Materials, Shanghai Dianji University, Shanghai, 201306, People's Republic of China*

*<sup>c</sup>School of Science, QingDao University of Technology, QingDao, 266520, People's Republic of China*

*<sup>d</sup>Key Laboratory of Integrated Regulation and Resources Development on Shallow Lakes, Ministry of Education, College of Environment, Hohai University, Nanjing, 210098, People's Republic of China*

† These authors contributed equally

**Table 1** The summary of engineering effects for the ferroelectrics and multiferroics.

| Ferroelectrics/<br>Multiferroics                                                        | Modulating<br>strategies                                                               | Effects                                                            | Ref. |
|-----------------------------------------------------------------------------------------|----------------------------------------------------------------------------------------|--------------------------------------------------------------------|------|
| $\text{CuInP}_2\text{S}_6$                                                              | pressure                                                                               | increasing polarization below 0.26 GPa                             | 92   |
| $\text{Hg}_3\text{Te}_2\text{Cl}_2$                                                     | pressure                                                                               | phase transition                                                   | 95   |
| $\text{Lu}_{0.5}\text{Sc}_{0.5}\text{FeO}_3$                                            | pressure                                                                               | enhancing polarization and $T_N$                                   | 111  |
| $\text{Bi}_5\text{Ti}_3\text{FeO}_{15}$                                                 | force                                                                                  | switching ferroelectric and magnetic domains                       | 114  |
| $[(\text{CH}_3)_2\text{NH}_2]\text{Co}(\text{HCOO})_3$                                  | pressure                                                                               | phase transition                                                   | 119  |
| $[(\text{CH}_3)_2\text{NH}_2]\text{Mn}(\text{HCOO})_3$                                  | pressure                                                                               | phase transition                                                   | 120  |
| $0.66\text{Bi}_{0.90}\text{Dy}_{0.10}\text{FeO}_3$ -<br>$0.34\text{PbTiO}_3$ (34PTDy10) | stress                                                                                 | magnetolectric coupling                                            | 128  |
| $\text{Ni}_{0.5}\text{Fe}_2\text{O}_4/\text{BaTiO}_3$                                   | stress                                                                                 | magnetolectric coupling                                            | 129  |
| $\text{PbTiO}_3$                                                                        | negative pressure                                                                      | increasing spontaneous polarization                                | 138  |
| $(\text{EuTiO}_3)_{0.5}:(\text{MgO})_{0.5}$                                             | negative pressure                                                                      | magnetolectric coupling                                            | 43   |
| $\text{Sn}_2\text{P}_2\text{S}_6$                                                       | light irradiation<br>(wavelength 532<br>nm 0.71, 1.42, 7.1<br>$\text{W}/\text{cm}^2$ ) | enhancing domain wall conductivity                                 | 154  |
| $\text{PbTiO}_3$                                                                        | light irradiation<br>(laser: wavelength<br>from 365 nm to<br>905 nm)                   | eliminating polar bubble domains                                   | 155  |
| $\text{BaTiO}_3$                                                                        | light irradiation<br>(laser wavelength<br>405 nm, 12.2<br>$\text{W}/\text{cm}^2$ )     | switching ferroelectric domains                                    | 44   |
| $\text{BiFe}_{0.8}\text{Co}_{0.2}\text{O}_3$                                            | light irradiation<br>(laser wavelength<br>405 nm, 95<br>$\text{mW}/\text{cm}^2$ )      | magneto–electric–optical coupling                                  | 159  |
| SA-PFA                                                                                  | light irradiation<br>(wavelength: 365<br>nm, 488 nm)                                   | structural transformation, switching ferroelectric<br>domain       | 142  |
| tBu-2-FSA                                                                               | light irradiation<br>(wavelength: 365<br>nm, 488 nm)                                   | structural transformation, switching ferroelectric<br>domain       | 163  |
| $\text{CH}_3\text{NH}_3\text{PbI}_3$                                                    | light irradiation<br>(wavelength: 450<br>nm, power: 0.5<br>mW)                         | switching ferroelectric domain                                     | 164  |
| $\text{Ni}(\text{DPA})_2$                                                               | UV light<br>irradiation<br>(wavelength: 365<br>nm, 405 nm)                             | tuning polarization                                                | 165  |
| $\text{Ni}/\text{BaTiO}_3$                                                              | visible light<br>illumination<br>(wavelength: 532<br>nm, power: 10<br>mW)              | cooperative ferroelectric and ferromagnetic domain<br>walls motion | 172  |

(References corresponding to the main text.)
